# Supplementary material for: Low somatosensory cortex excitability in the acute stage of low back pain causes chronic pain
Source: bioRxiv or medRxiv preprint supplement (doi:10.1101/2021.02.18.21251719), 2021-02-20
Supplement: Supplementary file [file media-1.pdf]

**Complete case analysis - Table 1.** Baseline characteristics of participants with complete data when outcome is defined by perceived pain at 6-month follow-up. Chronic pain (N = 67) was defined by the presence of pain (NRS  $\geq$  1) and recovery by the absence of pain (N = 29, NRS=0) at six-month follow up.

| Characteristic                                       | Recovered (N = 29) | Chronic pain (N = 67) | $P_{FDR}$ value   |
|------------------------------------------------------|--------------------|-----------------------|-------------------|
| Gender: Female (%)                                   | 48.2               | 55.2                  | 0.88              |
| Previous history of LBP: No (%)                      | 28.6               | 21.2                  | 0.86              |
| BDNF genotype: AA/AG (%)                             | 31.0               | 38.8                  | 0.86              |
| Cultural diversity: No (%)                           | 53.6               | 59.1                  | 0.95              |
| L3 map volume (cm <sup>2</sup> )                     | 9.6 (3.8)          | 7.9 (4.0)             | 0.22              |
| L5 map volume (cm <sup>2</sup> )                     | 7.8 (2.6)          | 7.9 (3.9)             | 0.96              |
| Log-transformed N <sub>80</sub> SEP area ( $\mu$ V)  | -1.6 (1.3)         | -3.2 (1.4)            | <b>&lt; 0.001</b> |
| Log-transformed N <sub>150</sub> SEP area ( $\mu$ V) | -1.6 (1.2)         | -3.0 (1.4)            | <b>&lt; 0.001</b> |
| Age (years) <sup>§</sup>                             | 33.9 (11.9)        | 42.1 (16.4)           | <b>0.02</b>       |
| Socioeconomic status (SEIFA score)                   | 1023.7 (51.3)      | 1021.7 (64.5)         | 0.96              |
| BDNF serum concentration (pg/mL)                     | 48189.3 (11343.6)  | 54030.1 (14462.4)     | 0.22              |
| Log-transformed CRP (pg/mL)                          | 14.2 (1.3)         | 14.8 (1.4)            | 0.22              |
| TNF (pg/mL)                                          | 6.88 (1.8)         | 7.8 (2.0)             | 0.16              |
| PCS score <sup>§</sup>                               | 6.0 (7.1)          | 12.5 (10.9)           | <b>&lt; 0.01</b>  |
| DASS-21 score <sup>§</sup>                           | 8.4 (7.5)          | 23.8 (21.0)           | <b>&lt; 0.001</b> |
| PSEQ score <sup>§</sup>                              | 52.5 (8.5)         | 44.8 (12.7)           | <b>&lt; 0.01</b>  |
| Local sensitivity (kPa)                              | 943.0 (367.1)      | 835.0 (361.3)         | 0.31              |
| Distal sensitivity (kPa)                             | 641.3 (269.0)      | 638.5 (216.6)         | 0.96              |

Variable means were compared between non-recovered and recovered low back pain participants using t tests (continuous variable) or  $X^2$  tests (categorical variables).

<sup>§</sup> Welch's t test was performed.

Statistically significant values are in bold font

Continuous data described as pooled mean  $\pm$  pooled SD. Categorical data described as percent.

AA/AG - G allele encodes Val, A allele encodes Met; BDNF – brain derived neurotrophic factor; CRP - C-reactive protein; DASS – depression, anxiety, stress subscale; FDR – false discover rate; LBP – low back pain; PCS – pain catastrophizing scale; PSEQ – pain self-efficacy questionnaire; TNF- $\alpha$  - tumor necrosis factor.

**Complete case analysis - Table 2.** Baseline characteristics of participants with complete data when outcome is defined by disability. Chronic disability (N = 35) was defined by RMDQ  $\geq$  3 and recovery by RMDQ score of  $\leq$  2 (N = 61) at six-month follow up.

| Characteristic                                       | Recovered (N = 61) | Chronic disability (N = 35) | $P_{\text{FDR}}$ value |
|------------------------------------------------------|--------------------|-----------------------------|------------------------|
| Gender: Female (%)                                   | 55.7               | 49.0                        | 0.71                   |
| Previous history of LBP: No (%)                      | 26.7               | 17.6                        | 0.65                   |
| BDNF genotype: AA/AG (%)                             | 41.0               | 28.6                        | 0.52                   |
| Cultural diversity: No (%)                           | 55.0               | 61.8                        | 0.71                   |
| L3 map volume (cm <sup>2</sup> )                     | 9.3 (4.0)          | 6.6 (3.3)                   | <b>0.03</b>            |
| L5 map volume (cm <sup>2</sup> )                     | 8.3 (3.3)          | 6.9 (3.9)                   | 0.28                   |
| Log-transformed N <sub>80</sub> SEP area ( $\mu$ V)  | -2.4 (1.5)         | -3.2 (1.5)                  | 0.10                   |
| Log-transformed N <sub>150</sub> SEP area ( $\mu$ V) | -2.4 (1.5)         | -2.85 (1.47)                | 0.34                   |
| Age (years) <sup>§</sup>                             | 36.6 (13.9)        | 44.9 (17.0)                 | 0.06                   |
| Socioeconomic status (SEIFA score)                   | 1019.2 (59.6)      | 1027.8 (62.5)               | 0.65                   |
| BDNF serum concentration (pg/mL)                     | 50573.7 (13232.0)  | 55156.8 (14449.8)           | 0.34                   |
| Log-transformed CRP (pg/mL)                          | 14.4 (1.3)         | 14.9 (1.4)                  | 0.29                   |
| TNF (pg/mL)                                          | 7.40 (2.0)         | 7.8 (1.9)                   | 0.65                   |
| PCS score <sup>§</sup>                               | 8.0 (8.6)          | 15.0 (11.6)                 | <b>0.01</b>            |
| DASS-21 score <sup>§</sup>                           | 14.0 (16.0)        | 28.2 (21.6)                 | <b>0.01</b>            |
| PSEQ score <sup>§</sup>                              | 50.6 (9.6)         | 40.9 (13.6)                 | <b>&lt; 0.01</b>       |
| Local sensitivity (kPa)                              | 854.9 (352.5)      | 887.8 (388.2)               | 0.71                   |
| Distal sensitivity (kPa)                             | 641.4 (254.2)      | 635.9 (193.4)               | 0.91                   |

Variable means were compared between non-recovered and recovered low back pain participants using t tests (continuous variable) or  $X^2$  tests (categorical variables).

<sup>§</sup> Welch's t test was performed.

Statistically significant values are in bold font

Continuous data described as mean  $\pm$  SD. Categorical data described as percent.

AA/AG - G allele encodes Val, A allele encodes Met; BDNF – brain derived neurotrophic factor; CRP - C-reactive protein; DASS – depression, anxiety, stress subscale; FDR – false discover rate; LBP – low back pain; PCS – pain catastrophizing scale; PSEQ – pain self-efficacy questionnaire; TNF- $\alpha$  - tumor necrosis factor.

**Complete case analysis - Figure 1.** Violin plots displaying the log-transformed distribution of baseline primary ( $N_{80}$ ) and secondary ( $N_{150}$ ) sensory evoked potential area under the curve mean amplitude ( $\mu V$ ) values, divided into those who recovered from their episode of acute LBP and those who developed **chronic pain** ( $NRS \geq 1$ ) at 6-months follow up. Boxplots represent median (horizontal line), 25th and 75th percentiles (box), and 10<sup>th</sup> and 90th percentiles (lines outside the box). Raw values were log-transformed prior to analysis.

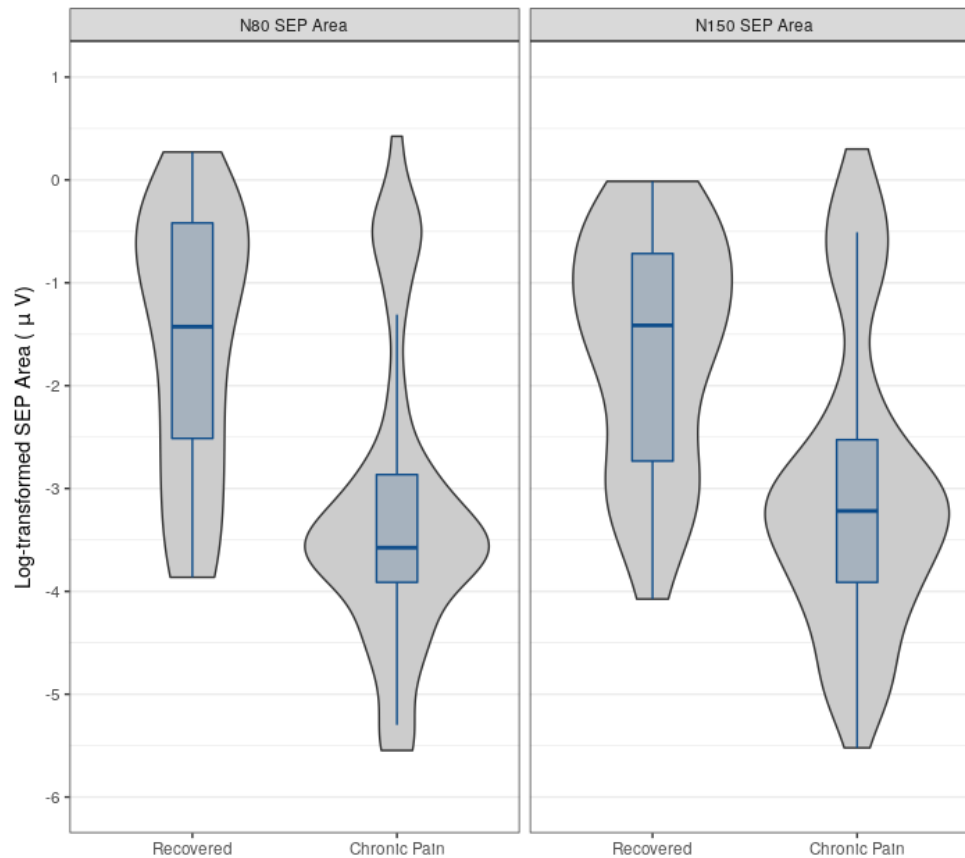

**Complete case analysis - Figure 2.** Violin plots displaying the log-transformed distribution of baseline primary ( $N_{80}$ ) and secondary ( $N_{150}$ ) sensory evoked potential area under the curve mean amplitude ( $\mu V$ ) values, divided into those who recovered from their episode of acute LBP and those who developed **chronic disability** ( $RMDQ \geq 3$ ) at 6-months follow up. Boxplots represent median (horizontal line), 25th and 75th percentiles (box), and 10<sup>th</sup> and 90th percentiles (lines outside the box). Raw values were log-transformed prior to analysis.

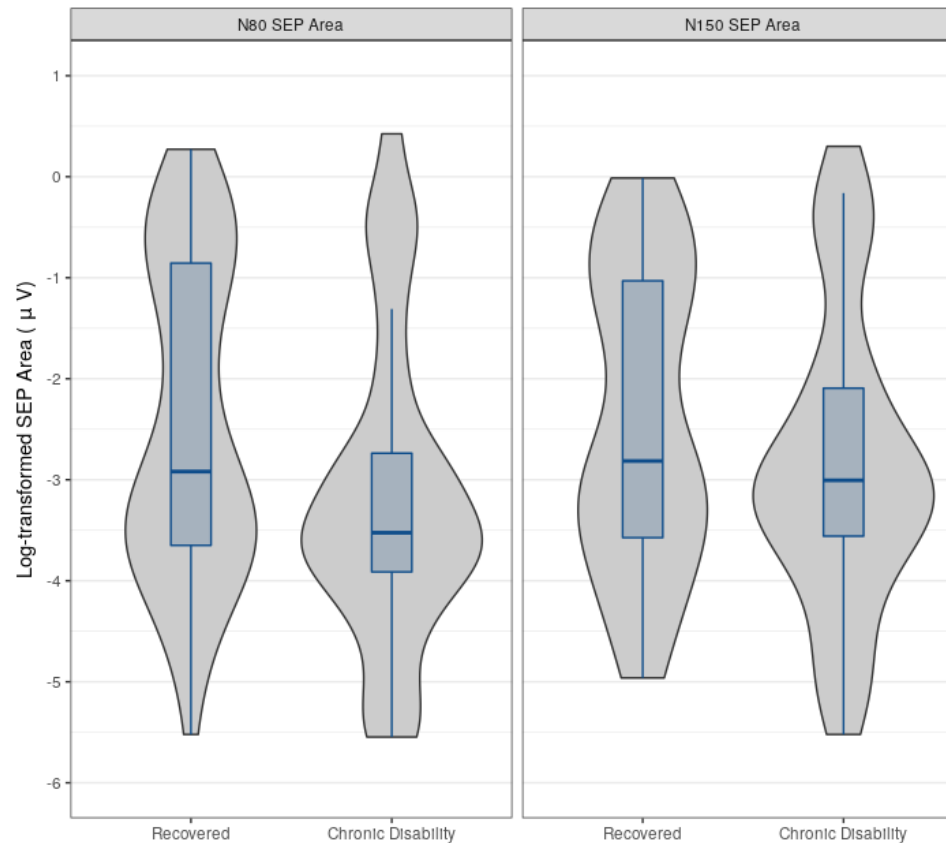

**Complete case analysis - Figure 3.** Violin plots displaying the distribution of baseline map volume (cm<sup>2</sup>) from the L3 and L5 electromyographic recording sites, divided into those who recovered from their episode of acute LBP and those who developed **chronic pain** (NRS  $\geq 1$ ) at six-month follow-up. Boxplots represent median (horizontal line), 25th and 75th percentiles (box), and 10<sup>th</sup> and 90th percentiles (lines outside the box).

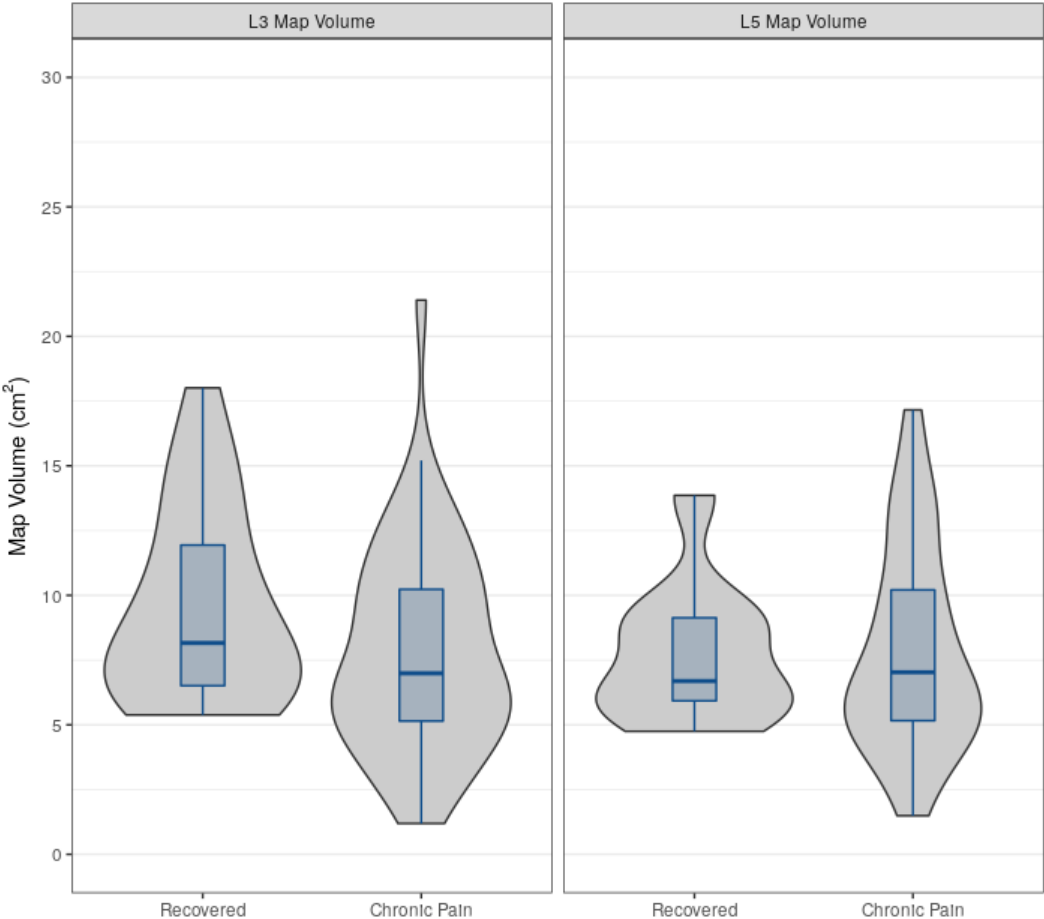

**Complete case analysis - Figure 4.** Violin plots displaying the distribution of baseline map volume (cm<sup>2</sup>) from the L3 and L5 electromyographic recording sites, divided into those who recovered from their episode of acute LBP and those who developed **chronic disability** (RMDQ  $\geq 3$ ) at six-month follow-up. Boxplots represent median (horizontal line), 25th and 75th percentiles (box), and 10<sup>th</sup> and 90th percentiles (lines outside the box).

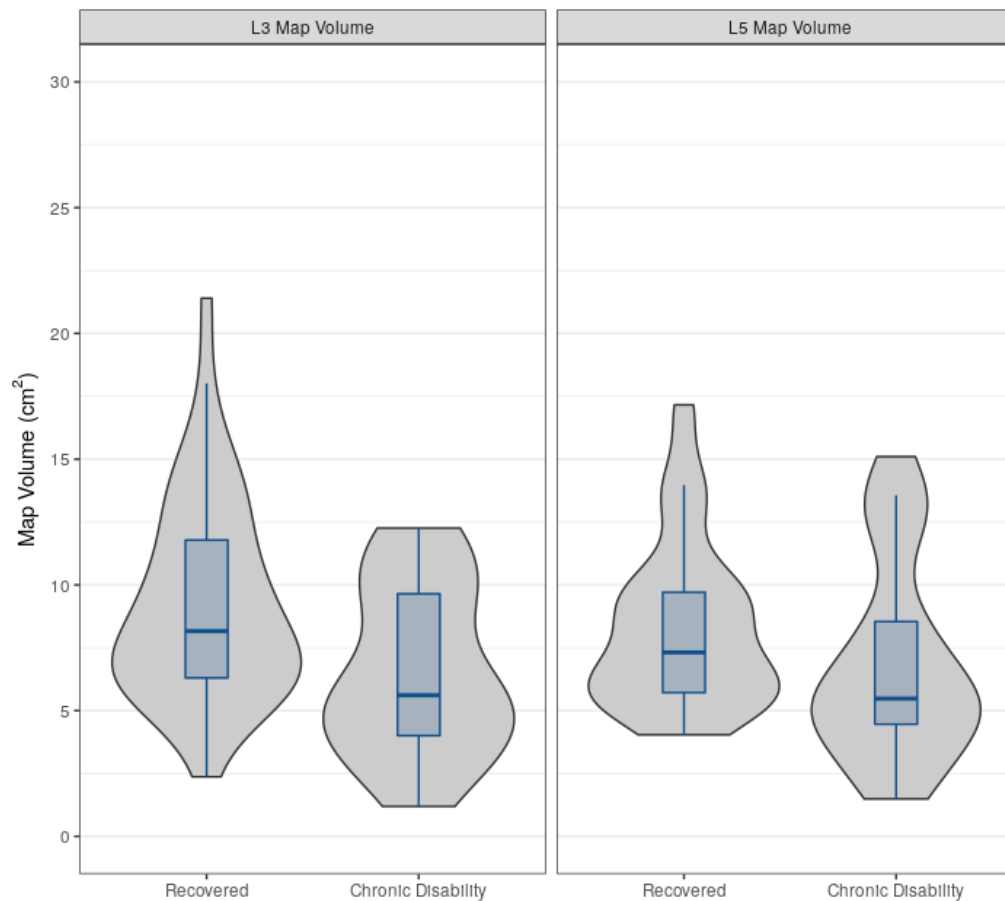

**Complete case analysis - Table 3.** Adjusted and unadjusted linear regression models, including only complete cases, to test the effects of baseline sensorimotor cortex activity on pain intensity and RMDQ score at six-month follow-up.

| Outcome        | Model                 | Exposure                                  | B (95% CI)           | P <sub>FDR</sub> |
|----------------|-----------------------|-------------------------------------------|----------------------|------------------|
| Pain Intensity | Unadjusted            | Log-transformed N <sub>80</sub> SEP area  | -0.58 (-0.85, -0.31) | < <b>0.001</b>   |
|                |                       | Log-transformed N <sub>150</sub> SEP area | -0.54 (-0.83, -0.25) | < <b>0.01</b>    |
|                |                       | L3 map volume                             | -0.18 (-0.30, -0.06) | <b>0.01</b>      |
|                |                       | L5 map volume                             | -0.06 (-0.20, 0.08)  | 0.41             |
|                | Adjusted <sup>1</sup> | Log-transformed N <sub>80</sub> SEP area  | -0.14 (-0.55, 0.26)  | 0.63             |
|                |                       | Log-transformed N <sub>150</sub> SEP area | -0.23 (-0.63, 0.17)  | 0.49             |
|                |                       | L3 map volume                             | -0.16 (-0.35, 0.02)  | 0.32             |
|                |                       | L5 map volume                             | -0.03 (-0.22, 0.17)  | 0.77             |
| RMDQ score     | Unadjusted            | Log-transformed N <sub>80</sub> SEP area  | -0.42 (-1.02, 0.17)  | 0.36             |
|                |                       | Log-transformed N <sub>150</sub> SEP area | -0.33 (-0.96, 0.30)  | 0.41             |
|                |                       | L3 map volume                             | -0.18 (-0.45, 0.09)  | 0.36             |
|                |                       | L5 map volume                             | 0.06 (-0.24, 0.37)   | 0.69             |
|                | Adjusted <sup>1</sup> | Log-transformed N <sub>80</sub> SEP area  | -0.42 (-1.28, 0.45)  | 0.44             |
|                |                       | Log-transformed N <sub>150</sub> SEP area | -0.62 (-1.47, 0.23)  | 0.29             |
|                |                       | L3 map volume                             | -0.46 (-0.88, -0.04) | 0.13             |
|                |                       | L5 map volume                             | -0.11 (-0.56, 0.35)  | 0.63             |

<sup>1</sup> Adjusted for predisposing factors, blood biomarkers, psychological variables and sensitisation.

Statistically significant values are in bold font

B – unstandardized beta coefficient, CI – confidence interval, FDR – false discovery rate, SEP – somatosensory evoked potential

**Complete case analysis - Table 4.** Adjusted and unadjusted logistic regression models, including only complete cases, to test the effects of baseline sensorimotor activity on chronic pain and chronic disability at six-month follow-up.

| Outcome                         | Model                 | Exposure                                  | OR (95% CI)         | $P_{\text{FDR}}$ | E-Value | E CI |
|---------------------------------|-----------------------|-------------------------------------------|---------------------|------------------|---------|------|
| Chronic pain <sup>&amp;</sup>   | Unadjusted            | Log-transformed N <sub>80</sub> SEP area  | 2.08 (1.52, 3.03)   | < <b>0.001</b>   | 2.24    | 1.76 |
|                                 |                       | Log-transformed N <sub>150</sub> SEP area | 2.04 (1.45, 2.94)   | < <b>0.001</b>   | 2.21    | 1.70 |
|                                 |                       | L3 map volume <sup>n.b.</sup>             | 1.11 (0.98, 1.28)   | 0.15             | 1.29    | 1.00 |
|                                 |                       | L5 map volume                             | 0.99 (0.85, 1.15)   | 0.91             | 1.08    | 1.00 |
|                                 | Adjusted <sup>1</sup> | Log-transformed N <sub>80</sub> SEP area  | 3.45 (1.30, 14.29)  | 0.08             | 3.12    | 1.54 |
|                                 |                       | Log-transformed N <sub>150</sub> SEP area | 7.14 (2.04, 100.00) | 0.07             | 4.79    | 2.21 |
|                                 |                       | L3 map volume <sup>n.b.</sup>             | 1.16 (0.93, 1.49)   | 0.23             | 1.37    | 1.00 |
|                                 |                       | L5 map volume                             | 1.12 (0.67, 2.00)   | 0.61             | 1.31    | 1.00 |
| Chronic disability <sup>#</sup> | Unadjusted            | Log-transformed N <sub>80</sub> SEP area  | 1.37 (1.03, 1.85)   | 0.07             | 1.62    | 1.14 |
|                                 |                       | Log-transformed N <sub>150</sub> SEP area | 1.22 (0.92, 1.67)   | 0.18             | 1.44    | 1.00 |
|                                 |                       | L3 map volume <sup>n.b.</sup>             | 1.25 (1.06, 1.52)   | 0.04             | 1.48    | 1.21 |
|                                 |                       | L5 map volume                             | 1.14 (0.98, 1.35)   | 0.15             | 1.33    | 1.00 |
|                                 | Adjusted <sup>1</sup> | Log-transformed N <sub>80</sub> SEP area  | 2.00 (0.99, 5.00)   | 0.22             | 2.18    | 1.00 |
|                                 |                       | Log-transformed N <sub>150</sub> SEP area | 1.69 (0.93, 3.45)   | 0.22             | 1.93    | 1.00 |
|                                 |                       | L3 map volume <sup>n.b.</sup>             | 1.16 (0.93, 1.56)   | 0.23             | 1.37    | 1.00 |
|                                 |                       | L5 map volume                             | 1.45 (0.93, 3.70)   | 0.23             | 1.70    | 1.00 |

<sup>&</sup> Chronic pain in this logistic model was defined as NRS score  $\geq 1$  at 6-month follow up.

<sup>#</sup> Chronic disability in this logistic model was defined as RMDQ score  $\geq 3$  at 6-month follow up.

<sup>1</sup> Adjusted for predisposing factors, blood biomarkers, psychological variables and sensitisation.

<sup>n.b.</sup> L3 map volume logistic regression models were not adequately powered to detect a meaningful effect. Therefore, we controlled for age, DASS, TNF- $\alpha$  and local PPT, a single variable from each confounder category. Despite this, no meaningful effects were observed, therefore this is unlikely to impact study conclusions.

Statistically significant values are in bold font

CI – confidence interval; DASS – depression, anxiety, stress subscale; FDR – false discovery rate; OR – odds ratio; PPT – pressure pain threshold; SEP – somatosensory evoked potential; TNF – tumor necrosis factor.
